# Supplementary material for: Valuation and Returns of Drug Development Companies: Lessons for Bioentrepreneurs and Investors
Source: PubMed Central journal article supplement (PMC8854317; doi:10.1007/s43441-021-00364-y), 2022-01-11
Supplement: 43441_2021_364_MOESM1_ESM.pdf [file 43441_2021_364_MOESM1_ESM.pdf]

## Supplementary Online Content

Michaeli DT, Yagmur HB, Achmadeev T, Michaeli T. Valuation and Returns of Drug Development Companies: Lessons for Bioentrepreneurs and Investors. *Therapeutic Innovation & Regulatory Science*. doi:10.1007/s43441-021-00364-y

- Table e1** Drug development success rates by subgroups
- Table e2** Descriptive statistics for the entire sample of Biopharma acquisitions
- Table e3** Stage-specific Biopharma company valuation (in million US dollars) by FDA orphan status, number of indications, molecule type, and disease area
- Figure e1** Company valuation, investment multiples, and annual returns, by development stage for the entire sample

This supplementary material has been provided by the authors to give readers additional information about their work.

|                                | Overall      | Orphan       | Oncology     | CNS          | Small-molecule | Biologic OR gene/cell therapy | Single-indication | Multi-indication |
|--------------------------------|--------------|--------------|--------------|--------------|----------------|-------------------------------|-------------------|------------------|
| Phase 1 to 2                   | 75.8%        | 96.1%        | 78.7%        | 75.0%        | 74.5%          | 84.4%                         | 75.8%             | 66.4%            |
| Phase 2 to 3                   | 55.6%        | 86.1%        | 53.9%        | 54.5%        | 52.5%          | 60.1%                         | 55.6%             | 58.3%            |
| Phase 3 to FDA Approval        | 67.7%        | 63.5%        | 48.5%        | 63.0%        | 71.0%          | 80.4%                         | 67.7%             | 59.0%            |
| <b>Phase 1 to FDA Approval</b> | <b>28.5%</b> | <b>52.5%</b> | <b>20.6%</b> | <b>25.8%</b> | <b>27.8%</b>   | <b>40.8%</b>                  | <b>28.5%</b>      | <b>22.8%</b>     |

**Table e1** Drug development success rates by subgroups

Data extracted from Wong et al. [1]. For the purposes of our analyses, success rates for orphan, small-molecule, and biologic drugs were adjusted to lead drugs only [1, 2]. *CNS* central nervous system, *FDA* US Food and Drug Administration.

|                                       | <b>N</b> | <b>Mean</b> | <b>Median</b> | <b>SD</b> | <b>Min.</b> | <b>Max.</b> | <b>Sum</b> |
|---------------------------------------|----------|-------------|---------------|-----------|-------------|-------------|------------|
| <b>A) Valuation</b>                   |          |             |               |           |             |             |            |
| Up-front payment                      | 303      | 958         | 257           | 2,270     | 0           | 22,434      | 290,417    |
| Milestone payment                     | 290      | 159         | 0             | 330       | 0           | 2,945       | 46,144     |
| Total deal value                      | 300      | 1,119       | 458           | 2,285     | 12          | 22,434      | 335,662    |
| <b>B) Lead drug</b>                   |          |             |               |           |             |             |            |
| Development stage                     |          |             |               |           |             |             |            |
| Pre-Clinic                            | 311      | 0.15        | 0.00          | 0.36      | 0           | 1           | 46         |
| Phase 1                               | 311      | 0.13        | 0.00          | 0.34      | 0           | 1           | 40         |
| Phase 2                               | 311      | 0.33        | 0.00          | 0.47      | 0           | 1           | 103        |
| Phase 3                               | 311      | 0.19        | 0.00          | 0.39      | 0           | 1           | 59         |
| Approved                              | 311      | 0.20        | 0.00          | 0.40      | 0           | 1           | 63         |
| No. of indications                    | 311      | 1.83        | 1.00          | 1.88      | 1           | 16          | 569        |
| Biologic OR gene/cell therapy         | 311      | 0.21        | 0.00          | 0.41      | 0           | 1           | 66         |
| Disease area                          |          |             |               |           |             |             |            |
| Oncology                              | 311      | 0.30        | 0.00          | 0.46      | 0           | 1           | 93         |
| CNS                                   | 311      | 0.16        | 0.00          | 0.37      | 0           | 1           | 51         |
| Others                                | 311      | 0.53        | 0.00          | 0.50      | 0           | 1           | 167        |
| FDA orphan designation                | 311      | 0.16        | 0.00          | 0.37      | 0           | 1           | 51         |
| <b>C) Other products</b>              |          |             |               |           |             |             |            |
| Total no. of drugs                    | 311      | 2.96        | 2.00          | 2.19      | 1           | 10          | 921        |
| Average no. of indications            | 311      | 1.46        | 1.00          | 1.09      | 1           | 12          | 455        |
| <b>D) Acquisition characteristics</b> |          |             |               |           |             |             |            |
| Target headquarter US                 | 311      | 0.76        | 1.00          | 0.43      | 0           | 1           | 235        |
| Spin-off / single drug deal           | 311      | 0.11        | 0.00          | 0.31      | 0           | 1           | 34         |

**Table e2** Descriptive statistics for the entire sample of Biopharma acquisitions

All valuation metrics are inflation adjusted to 2020. *CNS* central nervous system, *FDA* US Food and Drug Administration, *SD* standard deviation.

|                                      | Pre-Clinic      |                 | Phase 1    |                 | Phase 2    |                 | Phase 3      |                 | Approved     |                 |
|--------------------------------------|-----------------|-----------------|------------|-----------------|------------|-----------------|--------------|-----------------|--------------|-----------------|
|                                      | Mean            | <i>P</i> Value  | Mean       | <i>P</i> Value  | Mean       | <i>P</i> Value  | Mean         | <i>P</i> Value  | Mean         | <i>P</i> Value  |
| <b>FDA orphan designation status</b> |                 |                 |            |                 |            |                 |              |                 |              |                 |
| Orphan                               | NA <sup>a</sup> | NA <sup>a</sup> | 227        | <i>p</i> =0.257 | 744        | <i>p</i> =0.373 | 2,166        | <i>p</i> =0.317 | 3,703        | <i>p</i> <0.05  |
| Non-orphan                           | 88              |                 | 370        |                 | 673        |                 | 1,648        |                 | 1,964        |                 |
| <b>No. of indications</b>            |                 |                 |            |                 |            |                 |              |                 |              |                 |
| Multi-indication                     | 87              | <i>p</i> =0.484 | 594        | <i>p</i> <0.05  | 1,058      | <i>p</i> <0.05  | 2,249        | <i>p</i> =0.208 | 3,438        | <i>p</i> <0.01  |
| Single-indication                    | 88              |                 | 230        |                 | 522        |                 | 1,578        |                 | 1,670        |                 |
| <b>Molecule type</b>                 |                 |                 |            |                 |            |                 |              |                 |              |                 |
| Small-molecule                       | 71              | <i>p</i> <0.05  | 325        | <i>p</i> =0.139 | 517        | <i>p</i> <0.05  | 1,536        | <i>p</i> =0.103 | 2,105        | <i>p</i> =0.161 |
| Biologic OR gene/cell therapy        | 109             |                 | 341        |                 | 811        |                 | 3,759        |                 | 2,088        |                 |
| <b>Disease area</b>                  |                 |                 |            |                 |            |                 |              |                 |              |                 |
| Oncology                             | 70              | <i>p</i> =0.176 | 403        | <i>p</i> =0.242 | 1,068      | <i>p</i> <0.05  | 1,747        | <i>p</i> =0.490 | 4,561        | <i>p</i> <0.01  |
| CNS                                  | 67              | <i>p</i> =0.346 | 233        | <i>p</i> =0.204 | 314        | <i>p</i> <0.001 | 1,740        | <i>p</i> =0.490 | 2,066        | <i>p</i> =0.372 |
| Other <sup>b</sup>                   | 104             |                 | 343        |                 | 607        |                 | 1,775        |                 | 1,747        |                 |
| <b>Mean</b>                          | <b>99</b>       |                 | <b>479</b> |                 | <b>856</b> |                 | <b>2,255</b> |                 | <b>1,964</b> |                 |

**Table e3** Stage-specific Biopharma company valuation (in million US dollars) by FDA orphan status, number of indications, molecule type, and disease area

All valuation metrics are inflation adjusted to 2020. *P* Values calculated based on nonparametric bootstrapped *t* tests (resampling of 1,000 iterations with replacement). *CNS* central nervous system, *FDA* US Food and Drug Administration, *NA* not applicable.

<sup>a</sup> No valuation data exists for the Pre-Clinic orphan category given that the FDA only issues the orphan designation status after IND approval.

<sup>b</sup> The disease category “other” includes immunology, infectious disease, cardiovascular, dermatology, internal medicine, ophthalmology.

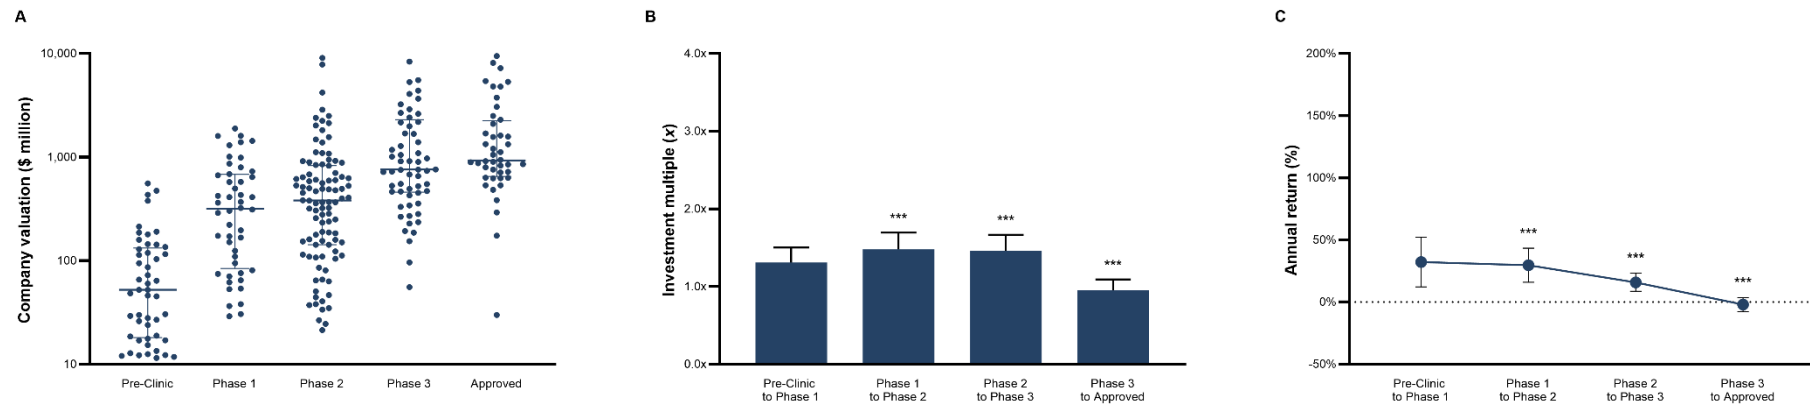

**Figure e1** Company valuation (A), investment multiples (B), and annual returns (C) by development stage for the entire sample

All valuation metrics are inflation adjusted to 2020. *P* Values calculated based on ANOVA with Dunnett's test compared to Pre-Clinic to Phase 1: \**p* < 0.05, \*\**p* < 0.01, \*\*\**p* < 0.001.
